# Supplementary material for: Dynamic Changes in Physicochemical and Microbiological Qualities of Coconut Water during Postharvest Storage under Different Conditions
Source: MDPI journal article supplement (doi:10.3390/horticulturae9121284), 2023-11-29

Supplementary Materials:

Figure S1: Bacterial communities in coconut samples under different storage conditions through DGGE analysis

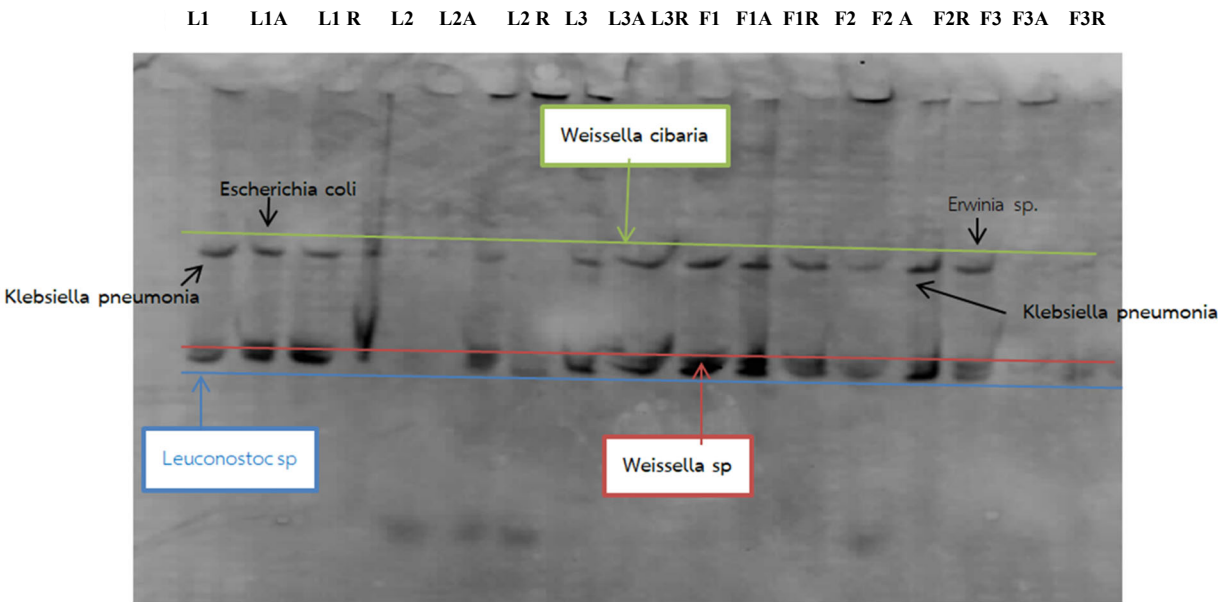

Table S1: Main microorganisms observed in every fresh and spoilage coconut waters under chilling and room temperature conditions by cultural plating

| Code | identity                       | %homology | Accession number |
|------|--------------------------------|-----------|------------------|
| B03  | <i>Klebsiella pneumoniae</i>   | 291/99    | MH203013.1       |
| C03  | <i>Klebsiella pneumoniae</i>   | 291/99    | MH203013.1       |
| D03  | <i>Staphylococcus arlettae</i> | 283/100   | KF233798.1       |
| E03  | <i>Kluyvera cryocrescens</i>   | 291/100   | LM655402.1       |
| F03  | proteobacterium                | 104/92    | GQ863469.1       |
| G03  | <i>Enterobacter</i> sp.        | 291/99    | KJ879990.1       |
| H03  | <i>Enterococcus faecium</i>    | 287/99    | KT626391.1       |
| A04  | <i>Lactobacillus fermentum</i> | 289/100   | KX951727.1       |
| B04  | <i>Candida tropicalis</i>      | 364/98    | KJ794698.1       |
| C04  | <i>Candida tropicalis</i>      | 377/98    | KY106848.1       |
| D04  | <i>Candida tropicalis</i>      | 383/99    | KJ794698.1       |
| C02  | <i>Candida tropicalis</i>      | 396/100   | AF267497.1       |
| B02  | <i>Candida tropicalis</i>      | 390/99    | GU373750.1       |

Figure S2: GC-MS analysis of dominant volatile compounds in coconut juice from processing sites (a), street vendor L1 with maturity stage of young; (b), street vendor L3 with maturity stage of mature; (c), street vendor L2; (d), industrial supplied F1; (e), industrial supplied F2; (f), industrial supplied F3.

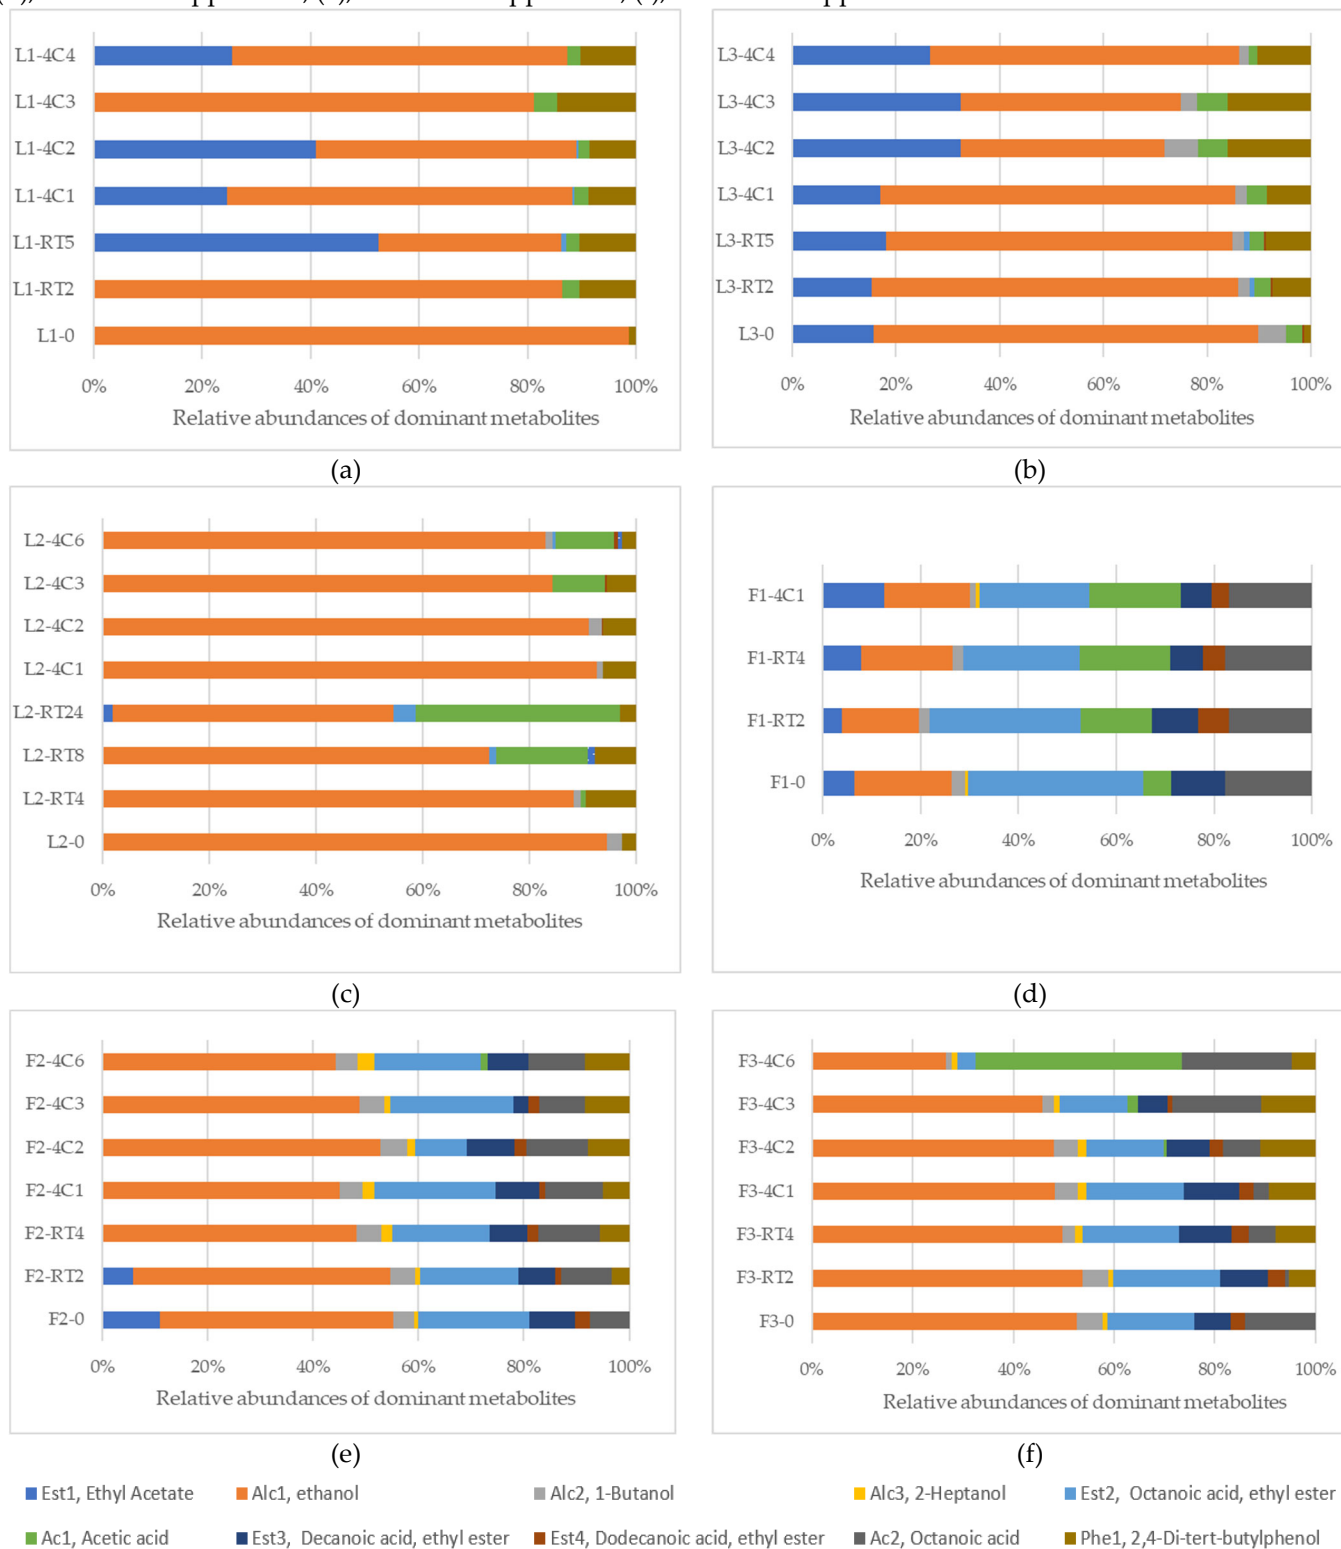

Supplement: s1 [file s1]
